# Supplementary material for: Population Pharmacokinetic Analysis for Imipenem–Relebactam in Healthy Volunteers and Patients With Bacterial Infections
Source: PubMed Central journal article supplement — CPT Pharmacometrics Syst Pharmacol. 2019 Oct 4;8(10):748–58. doi: 10.1002/psp4.12462 (PMC6813166; doi:10.1002/psp4.12462), 2019-10-04
Supplement: PSP4-8-748-s002.pdf [file PSP4-8-748-s002.pdf]

**Figure S2** Between subject variability (ETA) vs. covariate plots for each covariate:  $V_1$  parameter pair included in the final covariate model (right) in comparison with the model with no covariate relationships (left).

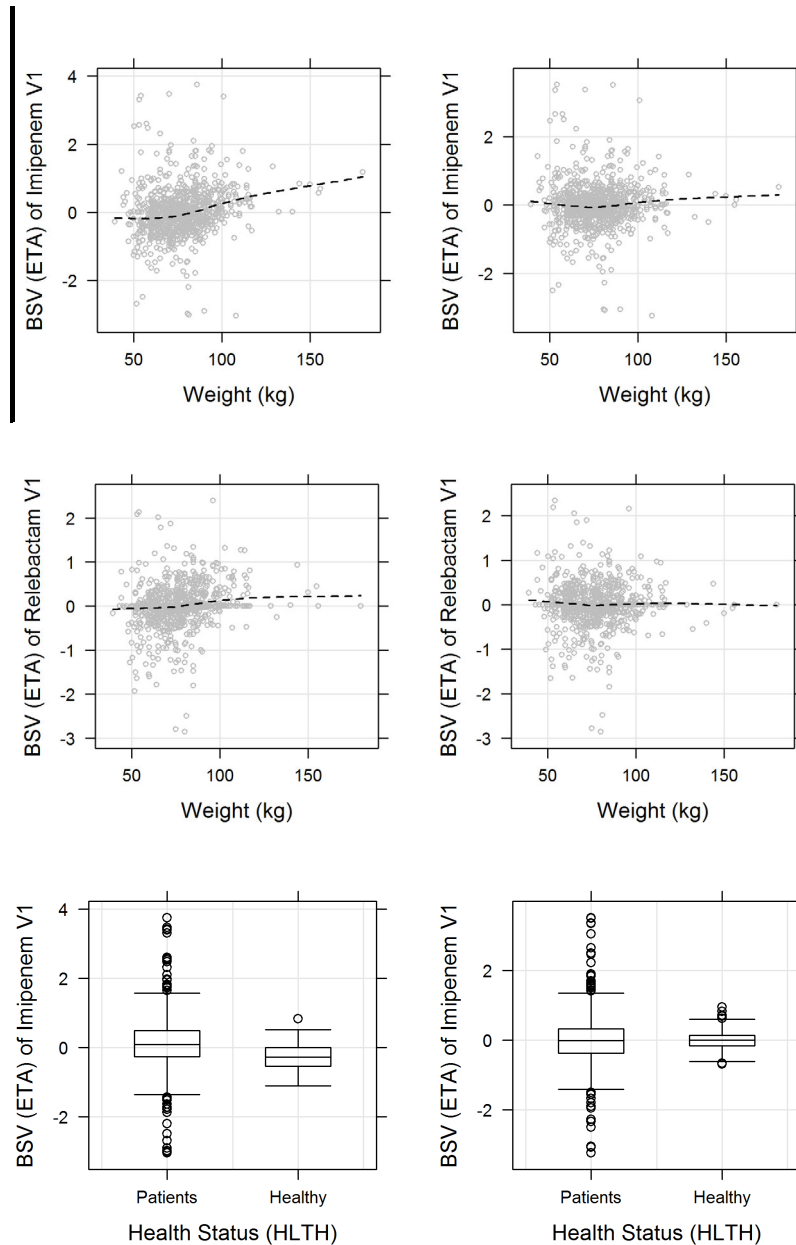

BSV, between-subject variability; ETA, random effects; HLTH, health status;  $V_1$ , apparent volume of the central compartment. Dashed line denotes smoothing line. Circles are individual observations of the relationship between ETA and covariates of interest. In box plots, the box denotes the median, 25<sup>th</sup>, and 75<sup>th</sup> percentiles, and the whiskers denotes the minimum and maximum values.
