# Supplementary material for: Population Pharmacokinetic Analysis for Imipenem–Relebactam in Healthy Volunteers and Patients With Bacterial Infections
Source: PubMed Central journal article supplement — CPT Pharmacometrics Syst Pharmacol. 2019 Oct 4;8(10):748–58. doi: 10.1002/psp4.12462 (PMC6813166; doi:10.1002/psp4.12462), 2019-10-04
Supplement: PSP4-8-748-s004.pdf [file PSP4-8-748-s004.pdf]

**Figure S4 Diagnostic plots from final model: relebactam.**

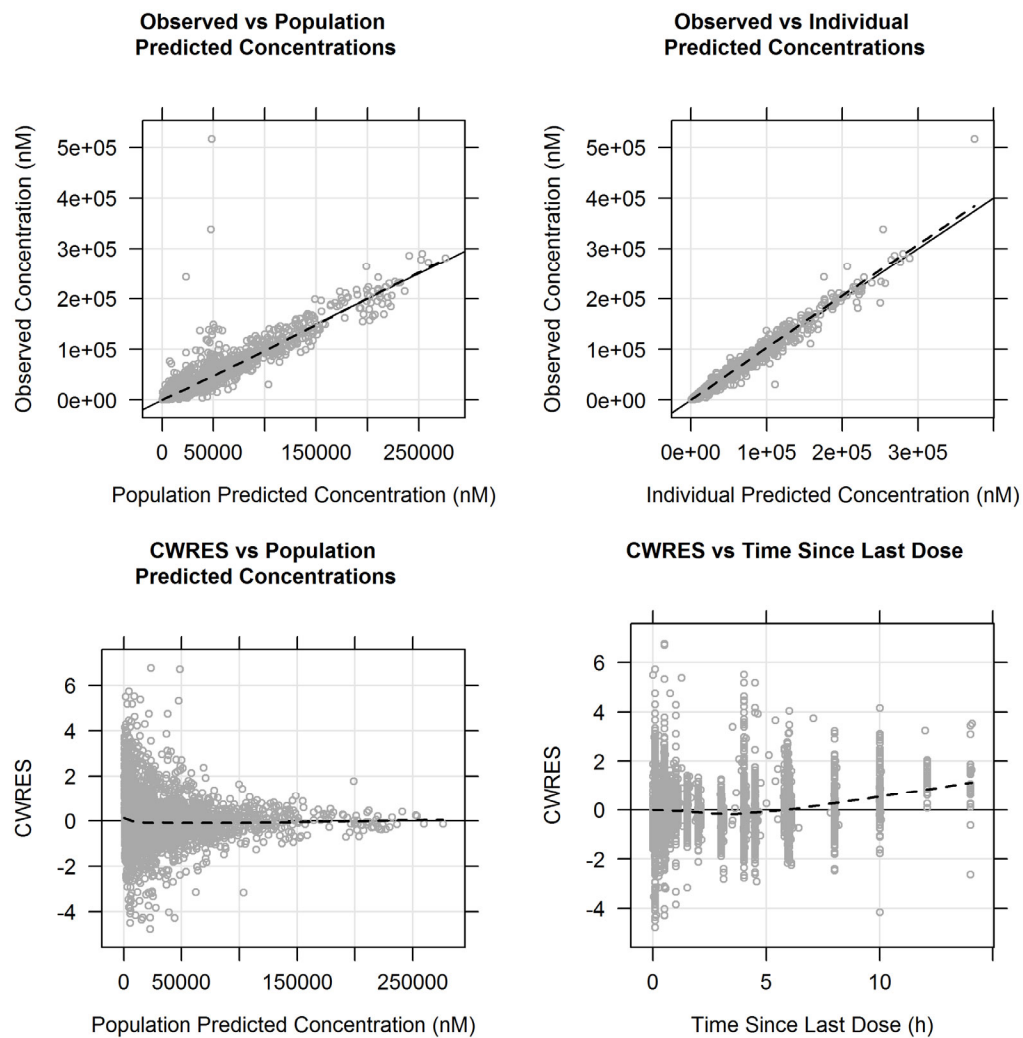

CWRES, conditioned weighted residuals; h, hour. Dashed line denotes smoothing line and the solid line is unity. Circles are individual observations.
